# Supplementary material for: Content of Acidic Compounds in the Bean of Coffea arabica L., Produced in the Department of Cesar (Colombia), and Its Relationship with the Sensorial Attribute of Acidity
Source: MDPI journal article supplement (doi:10.3390/separations11020052), 2024-02-07
Supplement: s1 [file s1]

Table S1. Parameters of analytical methods of organic compounds - Repeatability

| Acid<br>Acetic   | Repetition | Retention time |        |         | Area    |         |         |
|------------------|------------|----------------|--------|---------|---------|---------|---------|
|                  |            | Dia 1          | Dia 2  | Dia 3   | Dia 1   | Dia 2   | Dia 3   |
|                  | 1          | 20.234         | 20.232 | 20.232  | 442443  | 442309  | 439577  |
|                  | 2          | 20.231         | 20.243 | 20.233  | 438724  | 433912  | 441010  |
|                  | 3          | 20.249         | 20.241 | 20.239  | 434521  | 433078  | 438178  |
|                  | Mean       | 20.24          | 20.24  | 20.23   | 438563  | 436433  | 439588  |
|                  | SD         | 0.01           | 0.01   | 0.00    | 3963    | 5106    | 1416    |
|                  | CV (%)     | 0.05           | 0.03   | 0.02    | 0.90    | 1.17    | 0.32    |
| Acid<br>Citric   | Repetition | Retention time |        |         | Area    |         |         |
|                  |            | Dia 1          | Dia 2  | Dia 3   | Dia 1   | Dia 2   | Dia 3   |
|                  | 1          | 12.562         | 12.562 | 12.561  | 1155960 | 1149928 | 1144346 |
|                  | 2          | 12.561         | 12.535 | 12.551  | 1143421 | 1146059 | 1147507 |
|                  | 3          | 12.540         | 12.533 | 12.562  | 1145085 | 1160090 | 1149691 |
|                  | Mean       | 12.554         | 12.543 | 12.558  | 1148155 | 1152026 | 1147181 |
|                  | SD         | 0.01           | 0.02   | 0.01    | 6810    | 7247    | 2687    |
|                  | CV (%)     | 0.10           | 0.13   | 0.05    | 0.59    | 0.63    | 0.23    |
| Acid<br>Lactic   | Repetition | Retention time |        |         | Area    |         |         |
|                  |            | Dia 1          | Dia 2  | Dia 3   | Dia 1   | Dia 2   | Dia 3   |
|                  | 1          | 18.766         | 18.762 | 18.763  | 138522  | 137324  | 137708  |
|                  | 2          | 18.762         | 18.744 | 18.754  | 139051  | 133127  | 137901  |
|                  | 3          | 18.745         | 18.747 | 18.764  | 138478  | 132348  | 138787  |
|                  | Mean       | 18.758         | 18.751 | 18.760  | 138684  | 134266  | 138132  |
|                  | SD         | 0.01           | 0.01   | 0.01    | 319     | 2677    | 575     |
|                  | CV (%)     | 0.06           | 0.05   | 0.03    | 0.23    | 1.99    | 0.42    |
| Acid<br>Malic    | Repetition | Retention time |        |         | Area    |         |         |
|                  |            | Dia 1          | Dia 2  | Dia 3   | Dia 1   | Dia 2   | Dia 3   |
|                  | 1          | 14.607         | 14.607 | 14.607  | 599885  | 590831  | 596789  |
|                  | 2          | 14.606         | 14.601 | 14.604  | 587655  | 593394  | 596953  |
|                  | 3          | 14.607         | 14.598 | 14.603  | 603075  | 601246  | 593770  |
|                  | Mean       | 14.607         | 14.602 | 14.604  | 596872  | 595157  | 595837  |
|                  | SD         | 0.00           | 0.00   | 0.00    | 8140    | 5427    | 1792    |
|                  | CV (%)     | 0.00           | 0.03   | 0.02    | 1.36    | 0.91    | 0.30    |
| Acid<br>Quinic   | Repetition | Retention time |        |         | Area    |         |         |
|                  |            | Dia 1          | Dia 2  | Dia 3   | Dia 1   | Dia 2   | Dia 3   |
|                  | 1          | 15.094         | 15.093 | 15.092  | 753345  | 756234  | 760845  |
|                  | 2          | 15.091         | 15.078 | 15.0845 | 767307  | 773513  | 754790  |
|                  | 3          | 15.081         | 15.078 | 15.080  | 774931  | 786123  | 767179  |
|                  | Mean       | 15.089         | 15.083 | 15.085  | 765194  | 771957  | 760938  |
|                  | SD         | 0.01           | 0.01   | 0.01    | 10947   | 15005   | 6195    |
|                  | CV (%)     | 0.05           | 0.06   | 0.04    | 1.43    | 1.94    | 0.81    |
| Acid<br>Succinic | Repetition | Retention time |        |         | Area    |         |         |
|                  |            | Dia 1          | Dia 2  | Dia 3   | Dia 1   | Dia 2   | Dia 3   |
|                  | 1          | 17.913         | 17.911 | 17.912  | 117415  | 117218  | 116591  |
|                  | 2          | 17.911         | 17.949 | 17.930  | 116536  | 116087  | 117003  |
|                  | 3          | 17.961         | 17.947 | 17.954  | 116069  | 117208  | 116751  |
|                  | Mean       | 17.928         | 17.936 | 17.932  | 116673  | 116838  | 116782  |
|                  | SD         | 0.03           | 0.02   | 0.02    | 683     | 650     | 208     |
|                  | CV (%)     | 0.16           | 0.12   | 0.12    | 0.59    | 0.56    | 0.18    |

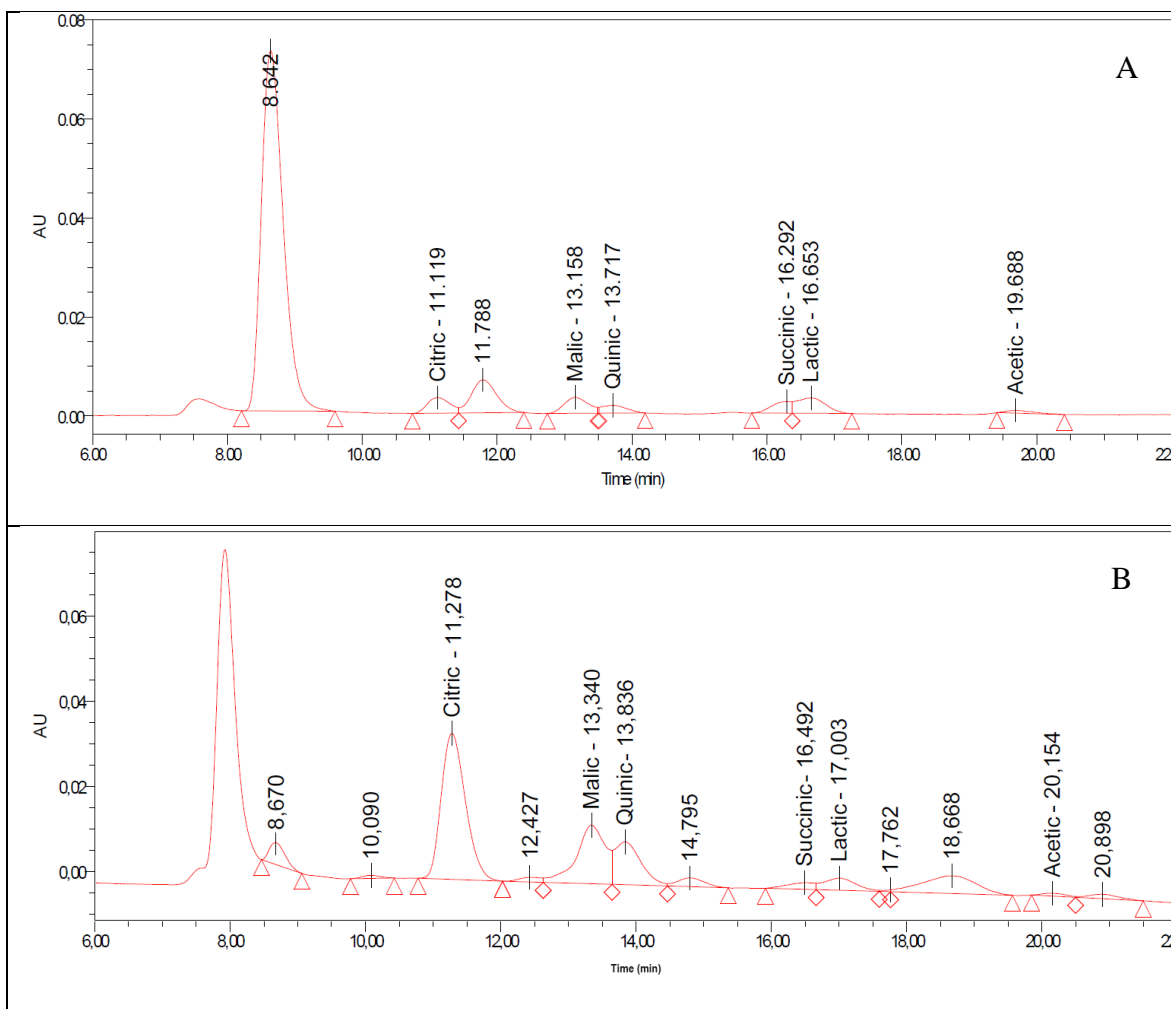

Figure S1: A. Chromatographic profile of the standard solution at 210 nm of citric acid (11.12 min), malic acid (13.16 min), quinic acid (13.72 min), succinic acid (16.29 min), lac-tic acid (16.65 min) and acetic acid 19.69 min) at 50 mg L<sup>-1</sup>. B. Chromatographic profile of the green coffee sample.

Table S2: Example of the calculations performed for the quantification of the samples.

| Name     | Area    | Amount | Weight (g) | Volume (mL) | [g kg <sup>-1</sup> ] |
|----------|---------|--------|------------|-------------|-----------------------|
| Acetic   | 110758  | 77.47  | 0.8820     | 25          | 2.20                  |
| Citric   | 1145038 | 466.11 | 0.8820     | 25          | 13.21                 |
| Lactic   | 94734   | 22.10  | 0.8820     | 25          | 0.63                  |
| Malic    | 304307  | 177.49 | 0.8820     | 25          | 5.03                  |
| Quinic   | 223276  | 201.47 | 0.8820     | 25          | 5.71                  |
| Succinic | 36993   | 24.10  | 0.8820     | 25          | 0.68                  |
